# Supplementary material for: Concerns related to COVID-19 in South Korea : What are associated individual and regional factors?
Source: Research Square preprint supplement (doi:10.21203/rs.3.rs-1947568/v2), 2022-11-15
Supplement: Supplementary file 1 [file 3e7ee10a09e6eba06d75e1c9.xlsx]

## Sheet: Table 3
Table 3. Association between area deprivation and individuals' concerns related to COVID-19, according to individuals' characteristics (sex, age group, and monthly income group)
Characteristic	Concerns related to COVID-19 (0-16 score)
	Area depriviation score a : Q1 (least)		Area depriviation score a : Q2				Area depriviation score a : Q3				Area depriviation score a : Q4 (most)
	β		β	SE	p-value		β	SE	p-value		β	SE	p-value
Sex
Men	Reference		0.24	0.132	0.07		0.222	0.147	0.132		0.243	0.126	0.053
Women	Reference		0.152	0.121	0.21		0.176	0.135	0.194		0.175	0.115	0.128
Age
19-29	Reference		0.272	0.137	0.046		0.234	0.154	0.128		0.392	0.133	0.003
30-39	Reference		0.158	0.136	0.245		0.334	0.154	0.03		0.412	0.132	0.002
40-49	Reference		0.195	0.131	0.137		0.205	0.147	0.162		0.316	0.125	0.012
50-59	Reference		0.189	0.128	0.14		0.049	0.143	0.729		0.161	0.122	0.186
60-69	Reference		0.171	0.132	0.197		0.15	0.147	0.308		0.116	0.125	0.354
≥70	Reference		0.12	0.159	0.45		0.18	0.176	0.305		0.093	0.15	0.535
Monthly Household income
< 2,000,000 ₩	Reference		0.15	0.139	0.279		0.179	0.154	0.245		0.138	0.131	0.292
2,000,000-2,999,999 ₩	Reference		0.23	0.129	0.074		0.249	0.143	0.082		0.222	0.122	0.069
3,000,000-3,999,999 ₩	Reference		0.163	0.144	0.259		0.196	0.161	0.223		0.306	0.138	0.026
4,000,000-4,999,999 ₩	Reference		0.276	0.145	0.057		0.085	0.162	0.599		0.228	0.139	0.1
≥ ₩ 5,000,000	Reference		0.19	0.132	0.151		0.196	0.148	0.185		0.279	0.126	0.027
Adjusted for sex, age, monthly household income, education, marital status, subjective heatlh status, alcohol drinking status, smoking status, depressive symptom score (PHQ-9), daily sleep duration, diabetes, high blood pressure, regional infection rate of COVID-19, and region type
a 255 administrative districts that classified in 2020 Korea Community Health Survey
