# Supplementary material for: Concerns related to COVID-19 in South Korea : What are associated individual and regional factors?
Source: Research Square preprint supplement (doi:10.21203/rs.3.rs-1947568/v2), 2022-11-15
Supplement: Supplementary file 2 [file 44ed00a05d32e2fb795f7920.xlsx]

## Sheet: Table 2
Table 2. Association of individual and area characteristics to individuals' concerns related to COVID-19
		Concerns related to COVID-19 (0-16 score)
Characteristics		Null Model				Model 1 (Area)				Model 2 (Individual)				Model 3 (Both)
		β	SE	p-value		β	SE	p-value		β	SE	p-value		β	SE	p-value
Individual level
	Sex
	Men									Reference				Reference
	Women									0.705	0.019	<0.001		0.705	0.019	<0.001
	Age
	19-29									Reference				Reference
	30-39									0.342	0.031	<0.001		0.342	0.031	<0.001
	40-49									0.167	0.032	<0.001		0.167	0.032	<0.001
	50-59									0.298	0.033	<0.001		0.298	0.033	<0.001
	60-69									0.469	0.036	<0.001		0.469	0.036	<0.001
	≥70									0.329	0.04	<0.001		0.329	0.04	<0.001
	Monthly Household income
	< ₩ 2,000,000									Reference				Reference
	₩ 2,000,000-2,999,999									0.128	0.021	<0.001		0.129	0.021	<0.001
	₩ 3,000,000-3,999,999									0.058	0.023	0.011		0.059	0.023	0.01
	₩ 4,000,000-4,999,999									-0.006	0.025	0.823		-0.004	0.025	0.863
	≥ ₩ 5,000,000									-0.17	0.021	<0.001		-0.168	0.021	<0.001
	Education
	Primary school grad., or below									Reference				Reference
	Middle school grad.									0.011	0.025	0.656		0.013	0.025	0.62
	High school grad.									-0.426	0.024	<0.001		-0.424	0.024	<0.001
	College, or above									-0.765	0.026	<0.001		-0.762	0.027	<0.001
	Marital status
	Single									Reference				Reference
	Married, live together									0.721	0.026	<0.001		0.72	0.026	<0.001
	Separated, divorced, bereaved									0.366	0.03	<0.001		0.366	0.03	<0.001
	Subjective health status
	Good									Reference				Reference
	Fair									0.173	0.015	<0.001		0.173	0.015	<0.001
	Bad									0.434	0.023	<0.001		0.434	0.023	<0.001
	Smoking status
	Smoke every day									Reference				Reference
	Smoke occasionally									0.025	0.052	0.635		0.025	0.052	0.627
	Past smoker									0.124	0.023	<0.001		0.124	0.023	<0.001
	Never smoked									0.128	0.023	<0.001		0.128	0.023	<0.001
	Alcohol drinking status
	More than 4 times / a week									Reference				Reference
	2 - 3 times / a week									0.25	0.033	<0.001		0.25	0.033	<0.001
	2 - 4 times / a month									0.311	0.032	<0.001		0.312	0.032	<0.001
	Once or less than once / a month									0.28	0.03	<0.001		0.28	0.03	<0.001
	Never drinked									0.241	0.032	<0.001		0.241	0.032	<0.001
	Diabetes
	No									Reference				Reference
	Yes									0.081	0.021	<0.001		0.081	0.021	<0.001
	High blood pressure
	No									Reference				Reference
	Yes									0.114	0.017	<0.001		0.114	0.017	<0.001
	Depressive symptom (PHQ-9 score)									0.039	0.002	<0.001		0.039	0.002	<0.001
	Daily sleep hours									0.021	0.005	<0.001		0.021	0.005	<0.001
Area level
	COVID-19 infection rate per 1,000 by region b					-0.032	0.053	0.547						-0.032	0.052	0.532
	Area depriviation score
	Quartile 1 (least): z-score < -3.67					Reference								Reference
	Quartile 2: -3.67 ≤ z-score < -0.15					0.273	0.127	0.031						0.195	0.124	0.117
	Quartile 3: -0.15 ≤ z-score < 3.61					0.348	0.141	0.014						0.201	0.138	0.147
	Quartile 4 (most): 3.61 ≤ z-score					0.484	0.120	<0.001						0.213	0.118	0.07
	Region
	Capital city
	Metropolitan areas					-0.078	0.128	0.544						-0.099	0.125	0.429
	Others					0.339	0.122	0.005						0.154	0.119	0.196
Between area variance (SE)		0.508 (0.048) *				0.390 (0.037) *				0.406 (0.039) *				0.376 (0.036) *
Model Fitness
	-2 Log Likelihood	1.15961e+06				1.15955e+06				1145681				1.14566e+06
	AIC	1159619				1159572				1145743				1145737
Intraclass correlation coefficient		4.86% b
SE, standard error, AIC, Akaike Information Criterion
a 255 administrative districts that classified in 2020 Korea Community Health Survey
b 4.86% of the variability in the scores of concerns related to COVID-19 is accounted for by the areas in the study
*p<.0001
