# Supplementary material for: Concerns related to COVID-19 in South Korea : What are associated individual and regional factors?
Source: Research Square preprint supplement (doi:10.21203/rs.3.rs-1947568/v2), 2022-11-15
Supplement: Supplementary file 3 [file 71eead91e0597e9ad44e1168.xlsx]

## Sheet: Table 1
Table 1. General characteristics of study population
Characteristics		Total	%	Concerns related to COVID-19 (0-16 score)
				Mean	SD	p-value
Individual level		225689	100	11.3161	3.22968
	Sex
	Men	102358	45.3536	10.8122	3.29672	<0.001
	Women	123331	54.6464	11.7343	3.11161
	Age
	19-29	25826	11.4432	10.2008	3.18469	<0.001
	30-39	25013	11.083	10.8708	3.0883
	40-49	35442	15.7039	10.8916	3.04471
	50-59	43913	19.4573	11.288	3.122
	60-69	44335	19.6443	11.8309	3.16285
	≥70	51160	22.6684	11.9689	3.35698
	Monthly Household income
	< ₩ 2,000,000	72049	31.924	11.7846	3.33285	<0.001
	₩ 2,000,000-2,999,999	35203	15.598	11.4633	3.19476
	₩ 3,000,000-3,999,999	31178	13.8146	11.2621	3.17165
	₩ 4,000,000-4,999,999	24423	10.8215	11.1104	3.10811
	≥ ₩ 5,000,000	62836	27.8419	10.8031	3.11767
	Education
	Primary school grad., or below	49639	21.9944	12.2245	3.25004	<0.001
	Middle school grad.	25257	11.1911	12.012	3.13043
	High school grad.	79722	35.3238	11.126	3.20587
	College, or above	71071	31.4907	10.6476	3.0821
	Marital status
	Single	39739	17.6079	10.2312	3.19341	<0.001
	Married, live together	141475	62.6858	11.4965	3.14534
	Separated, divorced, bereaved	44475	19.7063	11.7116	3.32236
	Subjective health status
	Good	108446	48.0511	10.9807	3.2804	<0.001
	Fair	87023	38.5588	11.4367	3.08454
	Bad	30220	13.3901	12.1726	3.27211
	Smoking status
	Smoke every day	32973	14.6099	10.7237	3.29845	<0.001
	Smoke occasionally	3855	1.7081	10.7712	3.25918
	Past smoker	41275	18.2884	11.0805	3.26431
	Never smoked	147586	65.3935	11.5285	3.18057
	Alcohol drinking status
	More than 4 times / a week	12651	5.6055	10.8898	3.41518	<0.001
	2 - 3 times / a week	27794	12.3152	10.9225	3.13139
	2 - 4 times / a month	40210	17.8166	10.9489	3.08803
	Once or less than once / a month	90261	39.9935	11.3598	3.20175
	Never drinked	54773	24.2692	11.8119	3.30887
	Diabetes
	No	199328	88.3198	11.2447	3.21524	<0.001
	Yes	26361	11.6802	11.8557	3.28711
	High blood pressure
	No	162792	72.1311	11.1143	3.20545	<0.001
	Yes	62897	27.8689	11.8382	3.23368
	Depressive symptom (PHQ-9 score), mean ± SD	1.95598		2.95083
	Daily sleep hours, mean ± SD	6.68279		1.26702
Area level
	COVID-19 infection rate per 1,000 by region a, mean ± SD	0.393921		0.791312
	Area depriviation score
	Quartile 1 (least): z-score < -3.67	89316	39.5748	10.9613	3.17448	<0.001
	Quartile 2: -3.67 ≤ z-score < -0.15	36763	16.2892	11.3135	3.15316
	Quartile 3: -0.15 ≤ z-score < 3.61	26563	11.7697	11.4629	3.24034
	Quartile 4: (most): 3.61 ≤ z-score	73047	32.3662	11.6978	3.28281
	Region
	Capital city	63135	27.9743	10.9869	3.15013	<0.001
	Metropolitan areas	44141	19.5583	11.0714	3.12533
	Others	118413	52.4673	11.5828	3.28596
PHQ-9, Patient Health Quastionnaire 9 items, SD, standard deviation
a 255 administrative districts that classified in 2020 Korea Community Health Survey
