# Supplementary material for: Concerns related to COVID-19 in South Korea : What are associated individual and regional factors?
Source: Research Square preprint supplement (doi:10.21203/rs.3.rs-1947568/v2), 2022-11-15
Supplement: Supplementary file 4 [file bb0936af935db6bdebddfead.xlsx]

## Sheet: Table 4
Table 4. Association between area deprivation and each type of concerns related to COVID-19
	Concern Type 1: Concerns about infection				Concern Type2: Concerns of dying by infection				Concern Type3: Concerns of being blamed by others of infection				Concern Type 4: Concerns of economic burdens due to infection
	β	SE	p-value		β	SE	p-value		β	SE	p-value		β	SE	p-value
Area depriviation score a
Quartile 1 (least): z-score < -3.67	Reference				Reference				Reference				Reference
Quartile 2: -3.67 ≤ z-score < -0.15	0.014	0.03	0.647		0.037	0.05	0.45		0.067	0.034	0.047		0.077	0.033	0.021
Quartile 3: -0.15 ≤ z-score < 3.61	0.025	0.034	0.456		0.052	0.055	0.35		0.062	0.037	0.096		0.062	0.037	0.094
Quartile 4 (most): 3.61 ≤ z-score	0.014	0.029	0.634		0.064	0.047	0.174		0.088	0.032	0.006		0.048	0.032	0.129
Abbreviations: SE, standard error
Adjusted for sex, age, monthly household income, education, marital status, subjective heatlh status, alcohol drinking status, smoking status, depressive symptom score (PHQ-9), daily sleep duration, diabetes, high blood pressure, regional infection rate of COVID-19, and region type
a 255 administrative districts that classified in 2020 Korea Community Health Survey
